# Supplementary material for: Facile and Green Fabrication of Carrageenan-Silver Nanoparticles for Colorimetric Determination of Cu2+ and S2−
Source: PubMed Central journal article supplement (PMC7023203; doi:10.3390/nano10010083), 2020-01-01
Supplement: nanomaterials-10-00083-s001.pdf [file nanomaterials-10-00083-s001.pdf]

# Facile and Green Fabrication of Carrageenan-Silver Nanoparticles for Colorimetric Determination of $\text{Cu}^{2+}$ and $\text{S}^{2-}$

Yesheng Wang<sup>1</sup>, Xueyi Dong<sup>1</sup>, Li Zhao<sup>1</sup>, Yun Xue<sup>1</sup>, Xihui Zhao<sup>1,2,\*</sup>, Qun Li<sup>1</sup> and Yanzhi Xia<sup>2</sup>

<sup>1</sup> School of Chemistry and Chemical Engineering, Qingdao University, Qingdao 266071, China; wynnrs@163.com (Y.W.); 18764216018@163.com (X.D.); 18363996863@163.com (L.Z.); xueyun@qdu.edu.cn (Y.X.); Qunli501@163.com (Q.L.)

<sup>2</sup> State Key Laboratory of Bio-Fibers and Eco-Textiles, Shandong Collaborative Innovation Center of Marine Biobased Fibers and Ecological Textiles, Institute of Marine Biobased Materials, Qingdao University, Qingdao 266071, China; xyz@qdu.edu.cn

\* Correspondence: zhaoxihui@qdu.edu.cn

Received: 12 December 2019; Accepted: 27 December 2019; Published: date

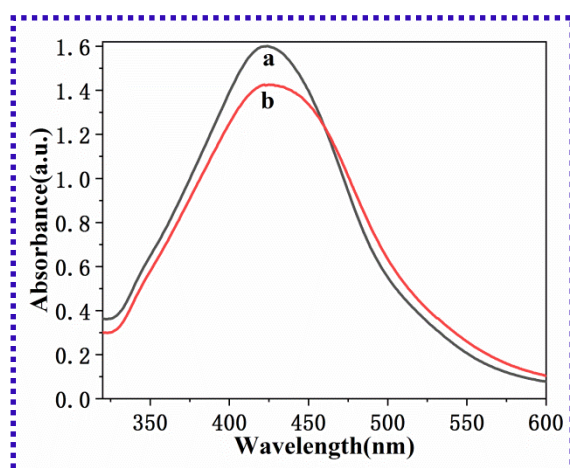

**Figure S1.** UV-vis spectra of carrageenan-AgNPs after reaction termination (a) and after 6 months storage at room temperature (b).

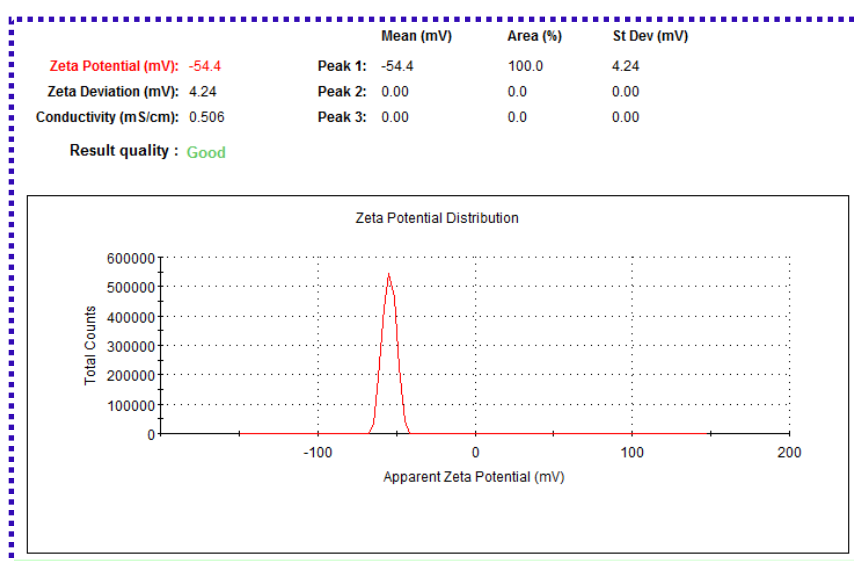

**Figure S2.** Zeta potential analysis of carrageenan-AgNPs prepared with 1 mM  $\text{Ag}^+$ .

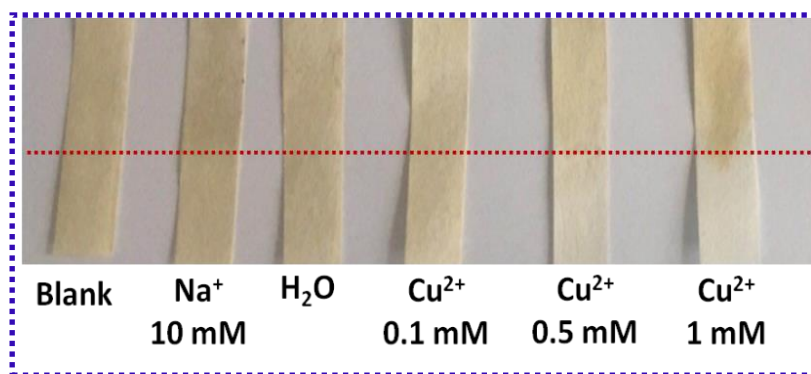

**Figure S3.** Photographs of test strips of carrageenan-AgNPs to various concentration of  $\text{Cu}^{2+}$ . (The lower half of the test strips were dipped into different solution.)

**Table S1** Comparison of the proposed  $\text{Cu}^{2+}$  detection method with other reported methods

| Methods                      | Probe         | Linear range/ $(\mu\text{M})$ | LOD/ $(\mu\text{M})$ | Ref.      |
|------------------------------|---------------|-------------------------------|----------------------|-----------|
| Fluorescent and colorimetric | F-hPEI Au NPs | 0.15–23                       | 0.077                | [1]       |
| Fluorescence                 | CDs           | 0–200                         | 40                   | [2]       |
| SWASV                        | AuNPs/CNFs    | 0.1–1.0                       | 0.1                  | [3]       |
| Colorimetric                 | CQ            | 0–18                          | 0.53                 | [4]       |
| Colorimetric                 | AuNPs         | 0.05–1.85                     | 0.03                 | [5]       |
| Colorimetric                 | probe S4      | —                             | 14.9                 | [6]       |
| Colorimetric                 | R/AgNPs       | 0.005–0.1                     | 0.001                | [7]       |
| Colorimetric                 | AgNPs         | 2.5–1000                      | 1.7                  | This work |

**Table S2** Comparison of the proposed  $\text{S}^{2-}$  detection method with other reported methods

| Methods           | Probe        | Linear range/ $(\mu\text{M})$ | LOD/ $(\mu\text{M})$ | Ref.      |
|-------------------|--------------|-------------------------------|----------------------|-----------|
| Colorimetric      | Chit-AgNPs   | 0.8–6.4                       | 0.35                 | [8]       |
| Fluorescence      | Papain-AuNCs | 0.5–80.0                      | 0.38                 | [9]       |
| Colorimetric      | CuNPs        | 12.5–50                       | 8.1                  | [10]      |
| Colorimetric      | GSH-AuNPs    | 5.0–15                        | 3.0                  | [11]      |
| Fluorescence      | Yeast-CuNCs  | 0–10                          | 0.01                 | [12]      |
| Electro chemistry | Au electrode | 0.5–12.7                      | 0.3                  | [13]      |
| Fluorescence      | sensor       | 0–14                          | 0.053                | [14]      |
| Colorimetric      | AgNPs        | 2.5–1000                      | 2.0                  | This work |

**Table S3.** Determination of Cu<sup>2+</sup> and S<sup>2-</sup> in tap water and lake water samples.

| Samples    | Concentration of Cu <sup>2+</sup> (μM) |          | Recovery (%) | RSD (n=3, %) |
|------------|----------------------------------------|----------|--------------|--------------|
|            | Spiked                                 | Measured |              |              |
| tap water  | 1                                      | 5        | 104.4        | 5.65         |
|            | 2                                      | 25       | 103.4        | 4.38         |
|            | 3                                      | 50       | 99.5         | 3.97         |
| lake water | 1                                      | 5        | 108          | 3.8          |
|            | 2                                      | 25       | 103.12       | 4.15         |
|            | 3                                      | 50       | 100.9        | 4.45         |

  

| Samples    | Concentration of S <sup>2-</sup> (μM) |          | Recovery (%) | RSD (n=3, %) |
|------------|---------------------------------------|----------|--------------|--------------|
|            | Spiked                                | Measured |              |              |
| tap water  | 1                                     | 5        | 115.60       | 5.45         |
|            | 2                                     | 25       | 106.00       | 5.22         |
|            | 3                                     | 50       | 100.50       | 4.14         |
| lake water | 1                                     | 5        | 113.00       | 3.79         |
|            | 2                                     | 25       | 99.44        | 3.25         |
|            | 3                                     | 50       | 102.20       | 4.15         |

1. Wang, N.; Liu, Y.; Li, Y.; Liu, Q.; Xie, M. Fluorescent and colorimetric sensor for Cu<sup>2+</sup> ion based on formaldehyde modified hyperbranched polyethylenimine capped gold nanoparticles. *Sensors Actuators, B Chem.* **2018**, *255*, 78–86.
2. Wang, L.; Li, M.; Li, W.; Han, Y.; Liu, Y.; Li, Z.; Zhang, B.; Pan, D. Rationally Designed Efficient Dual-Mode Colorimetric/Fluorescence Sensor Based on Carbon Dots for Detection of pH and Cu<sup>2+</sup> Ions. *ACS Sustain. Chem. Eng.* **2018**, *6*, 12668–12674.
3. Zhang, B.; Chen, J.; Zhu, H.; Yang, T.; Zou, M.; Zhang, M.; Du, M. Facile and green fabrication of size-controlled AuNPs/CNFs hybrids for the highly sensitive simultaneous detection of heavy metal ions. *Electrochim. Acta* **2016**, *196*, 422–430.
4. Wu, C.; Wang, J.; Shen, J.; Zhang, C.; Wu, Z.; Zhou, H. A colorimetric quinoline-based chemosensor for sequential detection of copper ion and cyanide anions. *Tetrahedron* **2017**, *73*, 5715–5719.
5. Hormozi-Nezhad, M.R.; Abbasi-Moayed, S. A sensitive and selective colorimetric method for detection of copper ions based on anti-aggregation of unmodified gold nanoparticles. *Talanta* **2014**, *129*, 227–232.
6. Mohammadi, A.; Yaghoubi, S. Development of a highly selective and colorimetric probe for simultaneous detection of Cu<sup>2+</sup> and CN<sup>-</sup> based on an azo chromophore. *Sensors Actuators, B Chem.* **2017**, *251*, 264–271.
7. Basiri, S.; Mehdinia, A.; Jabbari, A. Biologically green synthesized silver nanoparticles as a facile and rapid label-free colorimetric probe for determination of Cu<sup>2+</sup> in water samples. *Spectrochim. Acta - Part A Mol. Biomol. Spectrosc.* **2017**, *171*, 297–304.
8. Shanmugaraj, K.; Ilanchelian, M. Colorimetric determination of sulfide using

- chitosan-capped silver nanoparticles. *Microchim. Acta* **2016**, *183*, 1721–1728.
9. Wang, L.; Chen, G.; Zeng, G.; Liang, J.; Dong, H.; Yan, M.; Li, Z.; Guo, Z.; Peng, L. Fluorescent sensing of sulfide ions based on papain-directed gold nanoclusters. **2015**, 9306–9312.
  10. Hatamie, A.; Zargar, B.; Jalali, A. Talanta Copper nanoparticles: A new colorimetric probe for quick, naked-eye detection of sulfide ions in water samples. *Talanta* **2014**, *121*, 234–238.
  11. Links, D.A. Highly specific colorimetric recognition and sensing of sulfide with glutathione-modified gold nanoparticle probe based on an anion-for-molecule ligand exchange reaction. **2012**, 1556–1558.
  12. Jin, L.; Zhang, Z.; Tang, A.; Li, C.; Shen, Y. Biosensors and Bioelectronics Synthesis of yeast extract-stabilized Cu nanoclusters for sensitive fluorescent detection of sulfide ions in water. *Biosens. Bioelectron.* **2016**, *79*, 108–113.
  13. Yang, Y.; Yang, M.; Wang, H.; Jiang, J.; Shen, G.; Yu, R. An amperometric horseradish peroxidase inhibition biosensor based on a cysteamine self-assembled monolayer for the determination of sulfides. **2004**, *102*, 162–168.
  14. Cheng, F.; Wu, X.; Lon, Y.; Chen, G.; Zeng, R. Sensors and Actuators B: Chemical A porphyrin-based near-infrared fluorescent sensor for sulfur ion detection and its application in living cells. *Sensors Actuators B. Chem.* **2016**, *228*, 673–678.
